# Supplementary material
Source: PubMed Central journal article supplement (PMC6368861)
Supplement: NIHMS1509890-supplement-1.pdf [file NIHMS1509890-supplement-1.pdf]

## **Supplementary Methods**

### **Clonogenic cell survival assay**

Cells were seeded at 1,000 cells/well in 6-well plates. Next day, the cells were treated with alisertib (range: 0.01 – 0.25  $\mu\text{mol/L}$ ) in 2% FBS-DMEM medium. After 24 hrs, the medium was replaced by drug-free 10% FBS-DMEM medium and cells were allowed to grow for 10 days. Cell colonies were fixed with 2% paraformaldehyde solution for 10 min and stained overnight with crystal violet (0.05% crystal violet in 50% methanol). Cells were gently washed with 1X PBS and images were taken for quantification. Cell survival was determined by quantifying the dye signal in each well utilizing the ImageJ software (NIH).

### **Cell cycle distribution**

Cells were treated for 24, 48, and 72 hrs, then were fixed in 75% ethanol, treated with RNase A, and were resuspended in 1 ml Propidium Iodide (PI) solution (PI 50 $\mu\text{g/ml}$  and RNase 1  $\mu\text{g/ml}$  in 1x Phosphate Buffered Saline) and incubated at room temperature in the dark for 15-30 min. Subsequently, cell cycle distribution was measured and analyzed with BD LSR III Flow Cytometer (BD Biosciences, San Jose, CA) and the data were processed with BD FACS Diva software.

### **In vitro kinase assay**

The in vitro kinase assay was performed using active human recombinant AURKA and RPS6KB1 proteins (Cell Sciences). Briefly, reaction was carried out in 20  $\mu\text{L}$  assay buffer (50 mmol/L HEPES [pH7.4], 3 mmol/L  $\text{MgCl}_2$ , 3 mmol/L  $\text{MnCl}_2$ , 1 mmol/L dithiothreitol, 3  $\mu\text{mol/L}$  Na-orthovanadate, 0.5 mmol/L adenosine triphosphate) containing a constant amount of RPS6KB1 (0.2  $\mu\text{g}$ ) and increasing amounts of recombinant AURKA (from 0.001  $\mu\text{g}$  to 0.02  $\mu\text{g}$ ). The glutathione peroxidase 7 protein (Enzo Life Sciences, Inc., Farmingdale, NY) was used as a negative control for kinase activity. Reaction mixtures were incubated at 30°C for 30 min. In parallel, a range of concentrations of alisertib (500 nmol/L, 100 nmol/L, 10 nmol/L, 5 nmol/L) were added to a mixture of recombinant AURKA (0.1  $\mu\text{g}$ )

and RPS6KB1 (0.2 µg) and proteins were subjected to in vitro kinase assay followed by Western blot analysis.

### **Establishment of Tet-One™ inducible AURKA stable expression cell lines**

Flag-tagged coding sequence of AURKA was subcloned into EcoR I and BamH I sites of pTetOne Vector (Clontech). The target cell lines (AGS, SW480, HCT116) were seeded in a single well of a 6-well plate at a density sufficient to reach near confluence at 48 hr after transfection. Cells were co-transfected with 2 µg pTetOne-AURKA and 100 ng hygromycin Selection Marker. Transfection of cells was achieved by using PolyJet transfection reagent (SignaGen Laboratories) according to the manufacturer's instructions. For selection of positive cells, hygromycin was added at the concentration 50-200 ng, optimized for each cell line for two weeks. Cells were maintained using 10% doxycycline free FBS (Invitrogen). For induction of AURKA, doxycycline was added for 72h (100 ng/ml).

### **Lentiviral infection**

KRAS-G12D Lentiviral Plasmid (Human) (CMV) was purchased from Applied Biological Materials, KRAS knockdown constructs (pLV[shRNA]-Puro-U6>hKRAS) (shRNA-KRAS #5: VB160511-1123dwt and shRNA-KRAS #2: VB160511-1124fzb) were purchased from VectorBuilder (Santa Clara, CA). Lentivirus particles were produced by co-transfection of the lentiviral vectors with the 2<sup>nd</sup> Generation Packaging System Mix vector (Applied Biological Materials) into 293FT cells. Cells were selected with 1 µg/ml puromycin at least 48 hrs prior to experiments. Supernatants containing viral particles were collected after transfection for 2 days.

### **AURKA and RPS6KB1 silencing by small interfering RNA (siRNA)**

Cells were seeded at 60% confluency in 10% FBS DMEM for 24 hrs in p60 plates. AURKA or RPS6KB1 were transiently silenced by using validated siAURKA (Invitrogen), and siRPS6KB1 (Santa Cruz) for 48 or 72 hrs. A negative siRNA control (Ambion, Austin, TX) was used in each experiment. Transfection of cells was achieved by using LipoJet reagent (SignaGen) according to the

manufacturer's instructions. Following 24 hrs transfection, medium was replaced with DMEM or RPMI 1640 media, supplemented with 10% FBS and antibiotics. Validation of AURKA and RPS6KB1 knockdown was assessed by Western blot analyses.

### **Immunofluorescence**

Double immunofluorescence was used to co-localize AURKA and RPS6KB1. Cells were washed with PBS and fixed with a fresh 4% paraformaldehyde solution for 20 min in a humidified chamber; and then blocked in PBS with 0.5% Triton-X for 15 min and followed by incubation in 10% normal goat serum blocking solution (Thermo Fisher Scientific, Waltham, MA) for 20 min at room temperature. Cells were then incubated in the specific primary antibody against-Rabbit AURKA (Cell Signaling) diluted in blocking solution (1:100) and against-Mouse RPS6KB1 (Cell Signaling) in blocking solution (1:100) overnight at 4°C. Cells were washed 3 times in PBS and incubated in Alexa Fluor 568-conjugated goat anti-mouse (1:500) (Life Technologies) and Alexa Fluor 488-conjugated goat anti-Rabbit (1:500) (Life technologies) secondary antibody diluted in PBS for 45 min at room temperature. The cells were then washed in PBS, mounted with Vectashield/40'6-diamidino- 2-phenylindole (Vector Laboratories, Burlingame, CA), and visualized with a Zeiss LSM880 with AiryScan Confocal microscope (Carl Zeiss Microscopy, Thornwood, NY).

### **Statistical analysis**

Data are presented as means +/- standard error of mean (SEM). Statistical significance of difference between control groups and treatment groups was determined using One-way ANOVA Test. Statistical analyses were carried out using GraphPad Prism 5 software (GraphPad Software Inc., La Jolla, CA), nonlinear regression. The correlation between two parameters was determined by two-tailed Student's test. The differences were considered statistically significant when the  $P \leq 0.05$ .

**Supplementary Table S1. Histopathology, AURKA expression, and molecular correlatives of colon cancer tissue microarrays**

| ID    | AURKA Cytosolic CES Score | AURKA Nuclear CES Score | Clinical Stage | MSI Status | KRAS            | BRAF               | PIK3CA     |
|-------|---------------------------|-------------------------|----------------|------------|-----------------|--------------------|------------|
| CRC1  | 8                         | 12                      | 2A             | Unknown    | NA              | NA                 | NA         |
| CRC2  | 8                         | 12                      | 2A             | MSS        | wt              | wt                 | wt         |
| CRC3  | 7                         | 12                      | 3B             | Unknown    | NA              | NA                 | NA         |
| CRC4  | 8                         | 11                      | 3B             | MSS        | wt              | wt                 | wt         |
| CRC5  | 12                        | 6                       | 2A             | MSS        | NA              | NA                 | NA         |
| CRC6  | 12                        | 6                       | 2A             | MSS        | NA              | NA                 | NA         |
| CRC7  | 7                         | 11                      | 3C             | MSS        | p.Q61H; c.183A> | wt                 | wt         |
| CRC8  | 7                         | 11                      | 3C             | Unknown    | NA              | NA                 | NA         |
| CRC9  | 7                         | 11                      | 2B             | Unknown    | wt              | wt                 | wt         |
| CRC10 | 10                        | 8                       | 2A             | MSI-H      | NA              | NA                 | NA         |
| CRC11 | 8                         | 10                      | 2A             | Unknown    | NA              | NA                 | NA         |
| CRC12 | 8                         | 10                      | 3C             | MSS        | p.G12A;c.35G>C  | not tested         | not tested |
| CRC13 | 8                         | 10                      | 3B             | MSS        | p.G12A; c.35G>C | wt                 | wt         |
| CRC14 | 12                        | 5                       | 2A             | MSS        | NA              | NA                 | NA         |
| CRC15 | 6                         | 11                      | 3B             | MSS        | wt              | wt                 | wt         |
| CRC16 | 6                         | 11                      | 2B             | MSS        | p.G13D; c.38G>A | wt                 | wt         |
| CRC17 | 7                         | 10                      | 3B             | MSS        | wt              | p.G596R; c.1786G>C | wt         |
| CRC18 | 7                         | 10                      | 2A             | MSI-H      | wt              | p.V600E; c.1799T>A | wt         |
| CRC19 | 7                         | 7                       | 3B             | MSS        | wt              | wt                 | wt         |
| CRC20 | 8                         | 6                       | 2B             | MSI-H      | NA              | NA                 | NA         |
| CRC21 | 10                        | 6                       | 2A             | Unknown    | p.G12D; c.35G>A | wt                 | wt         |
| CRC22 | 6                         | 10                      | 2B             | MSS        | p.Q61L; c.182A> | wt                 | wt         |
| CRC23 | 8                         | 5                       | 2A             | Unknown    | NA              | NA                 | NA         |
| CRC24 | 7                         | 6                       | 2A             | Unknown    | NA              | NA                 | NA         |
| CRC25 | 7                         | 6                       | 2B             | Unknown    | NA              | NA                 | NA         |
| CRC26 | 12                        | 0                       | NA             | NA         | NA              | NA                 | NA         |
| CRC27 | 12                        | 0                       | 2A             | Unknown    | NA              | NA                 | NA         |
| CRC28 | 12                        | 0                       | 2A             | Unknown    | wt              | wt                 | wt         |

|       |    |    |    |         |                 |                    |                     |
|-------|----|----|----|---------|-----------------|--------------------|---------------------|
| CRC29 | 12 | 0  | 3B | MSS     | wt              | wt                 | wt                  |
| CRC30 | 0  | 12 | 2A | MSI-H   | p.G13D; c.38G>A | wt                 | wt                  |
| CRC31 | 5  | 10 | 2A | Unknown | NA              | NA                 | NA                  |
| CRC32 | 12 | 0  | 3B | MSS     | p.G12V; c.35G>T | wt                 | wt                  |
| CRC33 | 12 | 0  | 2A | MSI-H   | wt              | wt                 | wt                  |
| CRC34 | 12 | 0  | 2A | MSI-H   | wt              | p.V600E; c.1799T>A | wt                  |
| CRC35 | 12 | 0  | 2B | MSI-H   | wt              | wt                 | wt                  |
| CRC36 | 0  | 12 | 2B | MSS     | wt              | wt                 | wt                  |
| CRC37 | 0  | 12 | 2A | Unknown | NA              | NA                 | NA                  |
| CRC38 | 12 | 0  | 2A | MSI-H   | p.G13D; c.38G>A | wt                 | p.E542K; c.1624G>A  |
| CRC39 | 12 | 0  | 2B | Unknown | wt              | p.V600E; c.1799T>A | wt                  |
| CRC40 | 0  | 12 | 3B | MSI-H   | p.G12A; c.35G>C | p.D594G; c.1781A>G | wt                  |
| CRC41 | 12 | 0  | 3B | MSS     | wt              | wt                 | wt                  |
| CRC42 | 12 | 0  | 3C | Unknown | NA              | NA                 | NA                  |
| CRC43 | 12 | 0  | 2A | Unknown | p.G13D; c.38G>A | wt                 | wt                  |
| CRC44 | 6  | 6  | 2B | MSS     | NA              | NA                 | NA                  |
| CRC45 | 6  | 6  | 2A | MSS     | p.G13D; c.38G>A | wt                 | wt                  |
| CRC46 | 6  | 6  | 2A | Unknown | p.G12D; c.35G>A | wt                 | p.H1047R; c.3140A>C |
| CRC47 | 6  | 6  | 3B | Unknown | NA              | NA                 | NA                  |
| CRC48 | 6  | 6  | 3A | Unknown | wt              | wt                 | wt                  |
| CRC49 | 11 | 0  | 2B | Unknown | wt              | wt                 | wt                  |
| CRC50 | 11 | 0  | 2B | Unknown | wt              | wt                 | wt                  |
| CRC51 | 11 | 0  | 2A | Unknown | wt              | wt                 | wt                  |
| CRC52 | 0  | 11 | 3B | MSS     | NA              | NA                 | NA                  |
| CRC53 | 0  | 11 | 2A | MSS     | p.G12D; c.35G>A | wt                 | wt                  |
| CRC54 | 0  | 11 | 3B | MSS     | p.G12V; c.35G>T | wt                 | p.H1047R; c.3140A>C |
| CRC55 | 0  | 11 | 2A | MSS     | p.G13D; c.38G>A | wt                 | wt                  |
| CRC56 | 11 | 0  | 3C | Unknown | NA              | NA                 | NA                  |
| CRC57 | 0  | 11 | 2A | Unknown | NA              | NA                 | NA                  |
| CRC58 | 11 | 0  | 3B | MSS     | wt              | wt                 | wt                  |
| CRC59 | 0  | 11 | 3B | MSS     | wt              | wt                 | wt                  |
| CRC60 | 0  | 11 | 3B | Unknown | wt              | wt                 | wt                  |
| CRC61 | 11 | 0  | 3C | MSS     | NA              | NA                 | NA                  |
| CRC62 | 3  | 6  | 2A | MSS     | p.G12V; c.35G>T | wt                 | p.E545K; c.1633G>A  |

|       |    |    |    |         |                  |                    |                    |
|-------|----|----|----|---------|------------------|--------------------|--------------------|
| CRC63 | 6  | 5  | 2B | MSS     | p.G12C; c.34G>T  | wt                 | wt                 |
| CRC64 | 6  | 5  | 3B | MSI-H   | wt               | p.V600E; c.1799G>A | not tested         |
| CRC65 | 8  | 0  | 2A | MSS     | p.G12V; c.35G>T  | wt                 | wt                 |
| CRC66 | 0  | 8  | 2B | MSI-H   | NA               | NA                 | NA                 |
| CRC67 | 8  | 0  | 3B | Unknown | NA               | NA                 | NA                 |
| CRC68 | 8  | 0  | 3C | MSS     | wt               | wt                 | wt                 |
| CRC69 | 8  | 0  | 2A | MSS     | wt               | wt                 | wt                 |
| CRC70 | 8  | 0  | 3B | MSS     | NA               | NA                 | NA                 |
| CRC71 | 8  | 0  | 2A | MSS     | wt               | wt                 | wt                 |
| CRC72 | 8  | 0  | 3B | MSI-H   | NA               | NA                 | NA                 |
| CRC73 | 8  | 0  | 3B | MSI-low | NA               | NA                 | NA                 |
| CRC74 | 8  | 0  | 2B | Unknown | NA               | NA                 | NA                 |
| CRC75 | 8  | 0  | 2B | MSI-H   | p. G12V; c.35G>T | wt                 | p.E545K; c.1633G>A |
| CRC76 | 8  | 0  | 3B | MSS     | p.Q61L; c.182A>T | wt                 | wt                 |
| CRC77 | 8  | 0  | 2A | Unknown | NA               | NA                 | NA                 |
| CRC78 | 10 | 0  | 3B | MSI-H   | wt               | p.V600E; c.1799T>A | wt                 |
| CRC79 | 10 | 0  | 3B | MSS     | wt               | wt                 | wt                 |
| CRC80 | 0  | 10 | 2C | MSS     | NA               | NA                 | NA                 |
| CRC81 | 0  | 10 | 2A | Unknown | NA               | NA                 | NA                 |
| CRC82 | 0  | 10 | 2A | Unknown | p.G13D; c.38G>A  | wt                 | wt                 |
| CRC83 | 0  | 10 | 2B | Unknown | NA               | NA                 | NA                 |
| CRC84 | 0  | 10 | 2A | Unknown | NA               | NA                 | NA                 |
| CRC85 | 0  | 10 | 2A | MSS     | p.G13D; c.38G>A  | wt                 | wt                 |
| CRC86 | 10 | 0  | 3C | unknown | wt               | wt                 | wt                 |
| CRC87 | 10 | 0  | 2A | MSS     | p.G12D;c.35G>A   | wt                 | wt                 |
| CRC88 | 2  | 6  | 2A | Unknown | NA               | NA                 | NA                 |
| CRC89 | 0  | 10 | 2B | Unknown | NA               | NA                 | NA                 |
| CRC90 | 0  | 7  | 2A | Unknown | NA               | NA                 | NA                 |
| CRC91 | 7  | 0  | 3B | MSS     | wt               | wt                 | wt                 |
| CRC92 | 7  | 0  | 3A | MSS     | wt               | wt                 | wt                 |
| CRC93 | 0  | 7  | 3C | Unknown | NA               | NA                 | NA                 |
| CRC94 | 0  | 7  | 3B | MSS     | NA               | NA                 | NA                 |
| CRC95 | 7  | 0  | 2A | MSS     | NA               | NA                 | NA                 |
| CRC96 | 7  | 0  | 2A | MSI-H   | wt               | p.V600E; c.1799T>A | wt                 |

|        |    |   |    |         |                 |    |                    |
|--------|----|---|----|---------|-----------------|----|--------------------|
| CRC97  | 0  | 7 | 2A | Unknown | NA              | NA | NA                 |
| CRC98  | 7  | 0 | 3B | MSS     | p.G12V;c.35G>T  | wt | wt                 |
| CRC99  | 0  | 7 | 2A | MSS     | NA              | NA | NA                 |
| CRC100 | 7  | 0 | 2A | Unknown | NA              | NA | NA                 |
| CRC101 | 0  | 7 | 3C | MSS     | NA              | NA | NA                 |
| CRC102 | 7  | 0 | 2A | MSS     | wt              | wt | wt                 |
| CRC103 | 7  | 0 | 3A | MSS     | p.Q61R; c.182A> | wt | wt                 |
| CRC104 | 10 | 0 | 2A | MSS     | p.G13D; c.38G>A | wt | wt                 |
| CRC105 | 0  | 6 | 3C | Unknown | NA              | NA | NA                 |
| CRC106 | 6  | 0 | 2A | Unknown | p.G12V; c.35G>T | wt | wt                 |
| CRC107 | 0  | 6 | 3B | Unknown | NA              | NA | NA                 |
| CRC108 | 0  | 6 | 3B | Unknown | wt              | wt | wt                 |
| CRC109 | 6  | 0 | 2B | MSS     | p.G12S; c.34G>A | wt | wt                 |
| CRC110 | 6  | 0 | 3B | Unknown | NA              | NA | NA                 |
| CRC111 | 6  | 0 | 2A | Unknown | NA              | NA | NA                 |
| CRC112 | 0  | 6 | 3B | MSS     | p.G12V; c.35G>T | wt | wt                 |
| CRC113 | 6  | 0 | 3B | MSS     | wt              | wt | p.E542K; c.1624G>A |
| CRC114 | 0  | 6 | 3B | MSI-H   | wt              | wt | wt                 |
| CRC115 | 6  | 0 | 2A | Unknown | NA              | NA | NA                 |
| CRC116 | 6  | 0 | 2A | Unknown | NA              | NA | NA                 |
| CRC117 | 6  | 0 | 2A | MSS     | wt              | wt | wt                 |
| CRC118 | 6  | 0 | 2A | MSS     | NA              | NA | NA                 |
| CRC119 | 0  | 6 | 2A | MSI-H   | wt              | wt | wt                 |
| CRC120 | 6  | 0 | 2A | MSS     | p.G13D; c.38G>A | wt | wt                 |
| CRC121 | 6  | 0 | 2A | MSS     | wt              | wt | wt                 |
| CRC122 | 0  | 6 | 2A | MSS     | wt              | wt | wt                 |
| CRC123 | 6  | 0 | 3A | MSS     | NA              | NA | NA                 |
| CRC124 | 0  | 6 | 2B | MSI-H   | wt              | wt | wt                 |
| CRC125 | 0  | 6 | 2A | Unknown | NA              | NA | NA                 |
| CRC126 | 0  | 6 | 3C | Unknown | NA              | NA | NA                 |
| CRC127 | 6  | 0 | 3B | Unknown | NA              | NA | NA                 |
| CRC128 | 4  | 0 | 2A | Unknown | NA              | NA | NA                 |
| CRC129 | 0  | 5 | 3B | MSS     | wt              | wt | wt                 |
| CRC130 | 5  | 0 | 3C | MSS     | p.G12A; c.35G>C | wt | wt                 |

|        |   |   |    |         |                 |                    |            |
|--------|---|---|----|---------|-----------------|--------------------|------------|
| CRC131 | 5 | 0 | 3B | MSS     | wt              | wt                 | wt         |
| CRC132 | 3 | 0 | 3B | MSS     | NA              | NA                 | NA         |
| CRC133 | 5 | 0 | 2B | MSS     | p.G12D; c.35G>A | wt                 | wt         |
| CRC134 | 0 | 5 | 3B | MSS     | NA              | NA                 | NA         |
| CRC135 | 0 | 5 | 2A | Unknown | NA              | NA                 | NA         |
| CRC136 | 0 | 2 | 3B | Unknown | NA              | NA                 | NA         |
| CRC137 | 0 | 2 | 2B | MSI-H   | NA              | NA                 | NA         |
| CRC138 | 1 | 0 | 2A | Unknown | wt              | wt                 | wt         |
| CRC139 | 1 | 0 | 3B | Unknown | NA              | NA                 | NA         |
| CRC140 | 0 | 1 | 3B | MSS     | p.G12V;c.35G>T  | wt                 | not tested |
| CRC141 | 0 | 0 | 3C | Unknown | NA              | NA                 | NA         |
| CRC142 | 0 | 0 | 2A | MSS     | wt              | wt                 | wt         |
| CRC143 | 0 | 0 | 3C | Unknown | NA              | NA                 | NA         |
| CRC144 | 0 | 0 | 2B | Unknown | wt              | p.V600E; c.1799T>A | wt         |
| CRC145 | 0 | 0 | 3B | Unknown | NA              | NA                 | NA         |
| CRC146 | 0 | 0 | 3B | MSS     | p.G12V;c.35G>T  | wt                 | wt         |
| CRC147 | 0 | 0 | 3B | MSS     | wt              | wt                 | wt         |
| CRC148 | 0 | 0 | 3C | MSS     | wt              | wt                 | wt         |
| CRC149 | 0 | 0 | 3B | Unknown | p.G12D; c.35G>A | wt                 | wt         |
| CRC150 | 0 | 0 | 3B | Unknown | wt              | wt                 | wt         |
| CRC151 | 0 | 0 | 3A | MSS     | NA              | NA                 | NA         |



**Supplementary Table S2. Summary of molecular alterations in cell lines.**

| Cancers           | Genes      | KRAS      | TP53 | CTNNB1 | APC | TCF7L2 | BRAF | PIK3CA | *AURKA fold expression |
|-------------------|------------|-----------|------|--------|-----|--------|------|--------|------------------------|
|                   | Cell lines |           |      |        |     |        |      |        |                        |
| Upper GI cancer   | ESO26      | Amplified | MUT  | WT     | WT  | WT     | WT   | MUT    | 20.5                   |
|                   | AGS        | G12D      | WT   | MUT    | MUT | WT     | WT   | MUT    | 9.8                    |
|                   | SNU-601    | G12D      | MUT  | MUT    | WT  | WT     | WT   | WT     | 3.6                    |
|                   | SNU-1      | G12D      | WT   | WT     | WT  | WT     | WT   | WT     | 9.2                    |
|                   | STKM2      | WT        | WT   | WT     | WT  | WT     | WT   | WT     | 4.6                    |
|                   | MKN45      | WT        | WT   | WT     | WT  | WT     | WT   | WT     | 3.4                    |
| Colorectal cancer | HCT116     | G13D      | WT   | MUT    | WT  | WT     | WT   | MUT    | 15.6                   |
|                   | SW480      | G12V      | MUT  | WT     | MUT | WT     | WT   | WT     | 7.9                    |
|                   | SW620      | G12V      | MUT  | WT     | MUT | WT     | WT   | WT     | 2.7                    |
|                   | LS180      | G12D      | WT   | MUT    | MUT | WT     | MUT  | MUT    | 5.4                    |
|                   | LS153      | G12D      | WT   | MUT    | WT  | WT     | MUT  | WT     | 3.5                    |
|                   | SK-CO-1    | G12V      | WT   | WT     | MUT | WT     | WT   | WT     | 4.3                    |
|                   | RKO        | WT        | MUT  | WT     | WT  | WT     | MUT  | MUT    | 0.5                    |

This information was obtained from Cosmic online (<http://cancer.sanger.ac.uk/cosmic/>)

\*Fold expression was obtained by using qRT-PCR, normalized to 5 normal gastric & esophageal tissue samples (NG and NE). Data is also summarized in the graph below.

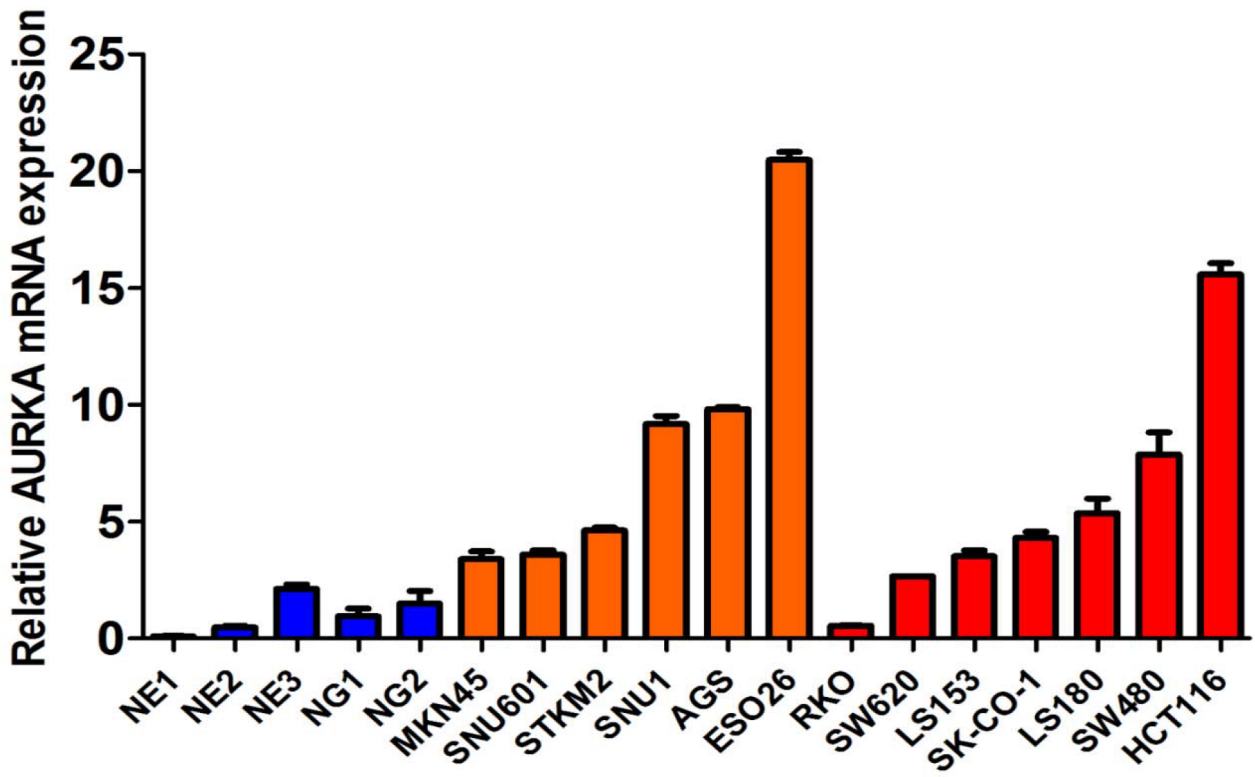

**Supplementary Table S3. Histopathology and AURKA expression levels in normal tissues and colon adenomas in tissue microarrays.**

| <b>ID</b> | <b>Histology</b> | <b>AURKA<br/>Cytosolic<br/>CES<br/>Score</b> | <b>AURKA<br/>Nuclear<br/>CES<br/>Score</b> |
|-----------|------------------|----------------------------------------------|--------------------------------------------|
| N1        | NORMAL           | 0                                            | 0                                          |
| N2        | NORMAL           | 2                                            | 0                                          |
| N3        | NORMAL           | 0                                            | 12                                         |
| N4        | NORMAL           | 0                                            | 12                                         |
| N5        | NORMAL           | 0                                            | 12                                         |
| N6        | NORMAL           | 0                                            | 12                                         |
| N7        | NORMAL           | 0                                            | 12                                         |
| N8        | NORMAL           | 0                                            | 12                                         |
| N9        | NORMAL           | 0                                            | 12                                         |
| N10       | NORMAL           | 0                                            | 12                                         |
| N11       | NORMAL           | 0                                            | 2                                          |
| N12       | NORMAL           | 0                                            | 0                                          |
| A1        | ADENOMA          | 12                                           | 0                                          |
| A2        | ADENOMA          | 8                                            | 0                                          |
| A3        | ADENOMA          | 8                                            | 0                                          |
| A4        | ADENOMA/NORMAL   | 1                                            | 0                                          |
| A5        | ADENOMA          | 6                                            | 0                                          |
| A6        | ADENOMA          | 11                                           | 0                                          |
| A7        | ADENOMA/NORMAL   | 0                                            | 0                                          |
| A8        | ADENOMA          | 0                                            | 7                                          |
| A9        | ADENOMA          | 2                                            | 0                                          |
| A10       | ADENOMA          | 6                                            | 0                                          |
| A11       | ADENOMA          | 12                                           | 0                                          |
| A12       | ADENOMA          | 3                                            | 0                                          |
| A13       | ADENOMA          | 0                                            | 1                                          |
| A14       | ADENOMA          | 0                                            | 6                                          |
| A15       | ADENOMA          | 10                                           | 0                                          |
| A16       | ADENOMA          | 8                                            | 10                                         |

### **Supplementary Figure Legends:**

**Supplementary Figure S1. Quantification data of Western blot data in Figure 2, 3 and 5.** A, Quantification data of Western blot data in Figure 2. B, Western blot quantification data of Figure 3A. C, Western blot quantification data of Figure 3B. D, Western blot quantification data of Figure 3C. E, Western blot quantification data of Figure 5A. F, Western blot quantification data of Figure 5B. G, Western blot quantification data of Figure 5C. H, Western blot quantification data of Figure 5D. I, Western blot quantification data of Figure 5E.

### **Supplementary Figure S2. Alisertib treatment inhibits cell survival and enhances polyploidy.**

AGS, SNU-601, and SW480 cells were treated with alisertib (0.2  $\mu$ M) for 24, 48 and 72 hrs, and cell cycle progression was analyzed with flow cytometry. The data indicated that alisertib treatment enhances polyploidy and alters cell cycle progression.

### **Supplementary Figure S3. The effect of alisertib treatment on KRAS downstream molecules**

A, Upper GI cancer (UGC) cells (ESO26, AGS, SNU-1, SNU-601) and colorectal cancer (CRC) cells (HCT116, SW480, SW620) were treated with alisertib (0.2  $\mu$ M) for 1, 2, 3, and 5 days, and cell lysates were subjected to Western blot analysis of the indicated proteins. The data showed that compared with control, there was no significant change on Phospho-MEK1/2 (Ser217/221) and phosphor-MTOR (Ser2448) with alisertib treatment in tested cell lines; although there was a decreased expression of phosphor-AKT (Ser473) in tested cell lines, the time point of p-AKT downregulation is different and not consistent in different cell lines.

### **Supplementary Figure S4. AURKA knockdown induced apoptosis and suppressed cell growth in**

**GI cancer cells.** UGC (ESO26, AGS, SNU-1, SNU-601) and CRC cells (HCT116, SW480, SW620) were transfected with siControl or siAURKA for 48 or 72 hrs and subjected to Western blot analysis (A)

and cell growth CellTiter-Glo analysis (B). The data indicated that knockdown of AURKA upregulated protein expression of p53 (only in p53 WT cell lines), p21, BIM, Cleaved PARP, Cleaved caspase 3, and suppressed cell growth. C, Upper GI cancer cells (AGS, SNU-601, SNU-1) and CRC cells (HCT116, SW480, SW620) were transfected with siControl or siRPS6KB1 for 48 hrs, cells were subjected to cell growth CellTiter-Glo analysis, which were measured every two days and normalized to the corresponding values of day 1. Accordingly, loss of RPS6KB1 suppressed cell growth.

**Supplementary Figure S5. AURKA knockdown decreased phospho-RPS6KB1 expression in mutant KRAS cells.** Western blot data analysis of AURKA, phospho-RPS6KB1, RPS6KB1, and Actin expression levels in SNU1 (mutant KRAS, G12D), MKN45 (wild type KRAS), and STKM2 (wild type KRAS) cells.

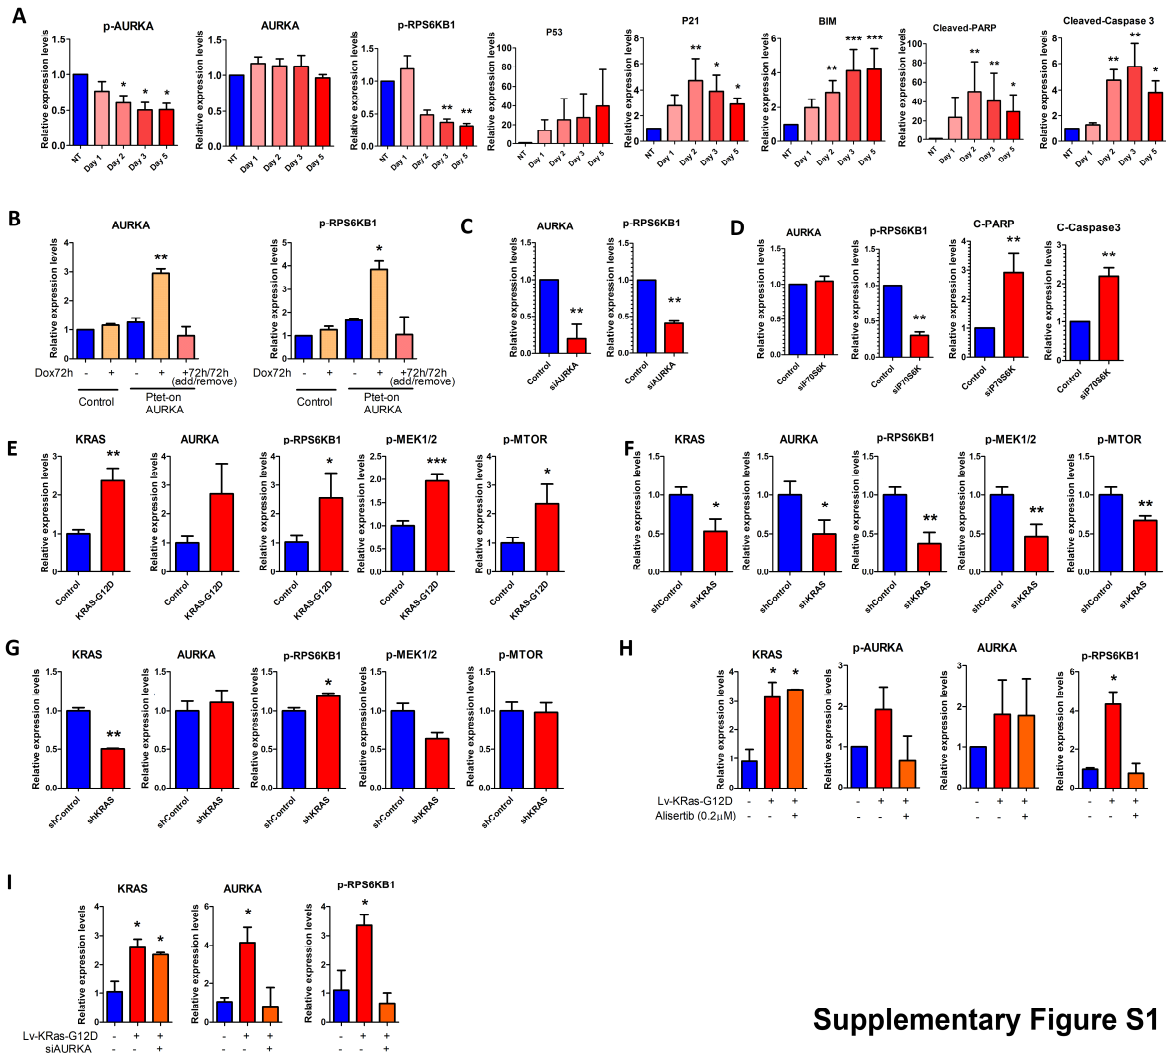

Supplementary Figure S1

**A**

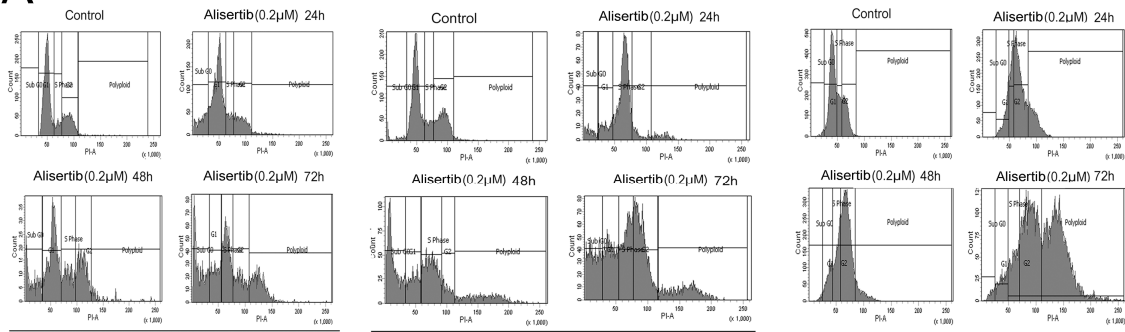

|           | AGS     |                  |      |      |
|-----------|---------|------------------|------|------|
|           | Control | Alisertib(0.2μM) |      |      |
|           |         | 24h              | 48h  | 72h  |
| Sub-G0    | 0.1     | 14.1             | 16.0 | 24.7 |
| G1        | 62.8    | 55.0             | 39.4 | 15.5 |
| S phashe  | 8.9     | 9.3              | 16.9 | 25.4 |
| G2-M      | 24.2    | 16.3             | 23.1 | 14.5 |
| Ployploid | 0.4     | 3.4              | 7.8  | 19.1 |

|           | SNU-601 |                  |      |      |
|-----------|---------|------------------|------|------|
|           | Control | Alisertib(0.2μM) |      |      |
|           |         | 24h              | 48h  | 72h  |
| Sub-G0    | 4.2     | 8.0              | 26.0 | 29.0 |
| G1        | 54.6    | 18.1             | 14.8 | 13.4 |
| S phashe  | 11.1    | 9.9              | 29.4 | 22.8 |
| G2-M      | 27.5    | 47.4             | 7.3  | 28.0 |
| Ployploid | 0.6     | 2.5              | 6.5  | 11.7 |

|           | SW480   |                  |      |      |
|-----------|---------|------------------|------|------|
|           | Control | Alisertib(0.2μM) |      |      |
|           |         | 24h              | 48h  | 72h  |
| Sub-G0    | 2.4     | 0.3              | 1.5  | 1.7  |
| G1        | 58.4    | 14.8             | 12.9 | 5.7  |
| S phashe  | 16.0    | 20.6             | 22.4 | 10.3 |
| G2-M      | 23.3    | 47.1             | 55.6 | 35.8 |
| Ployploid | 0.6     | 16.9             | 11.7 | 46.4 |

**Supplementary Figure S2**

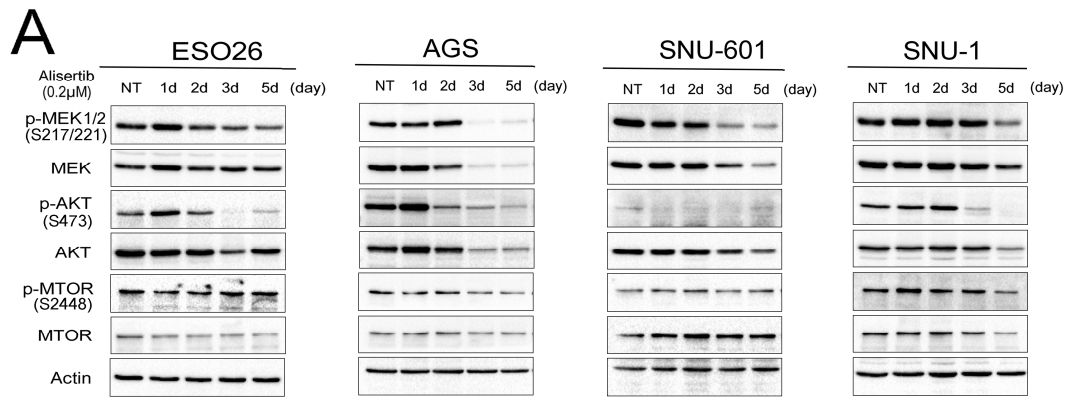

**UGC**

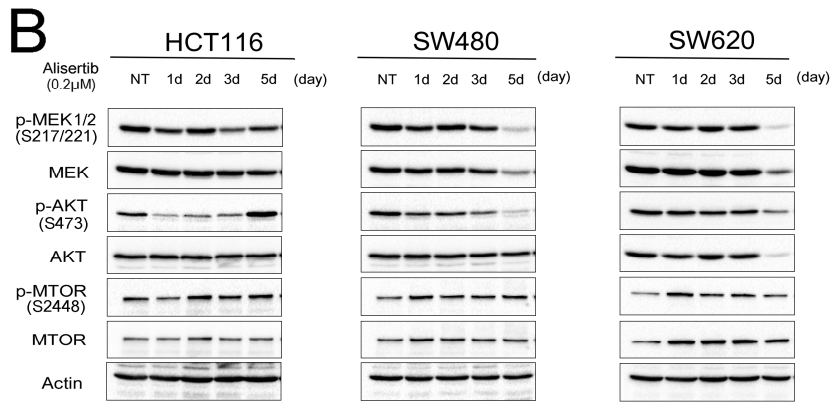

**CRC**

**Supplementary Figure S3**

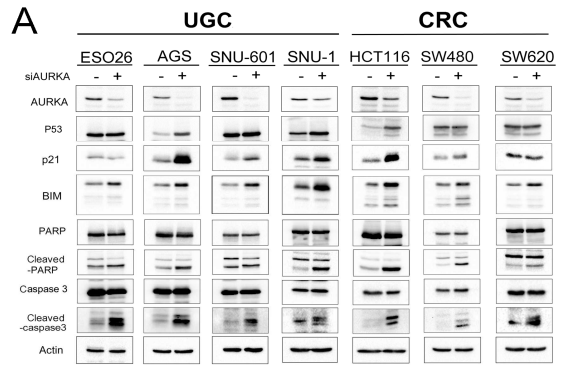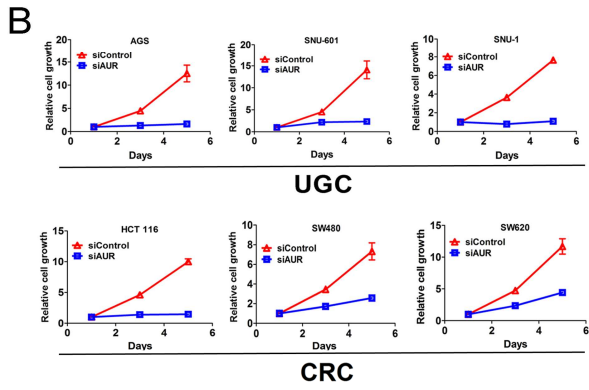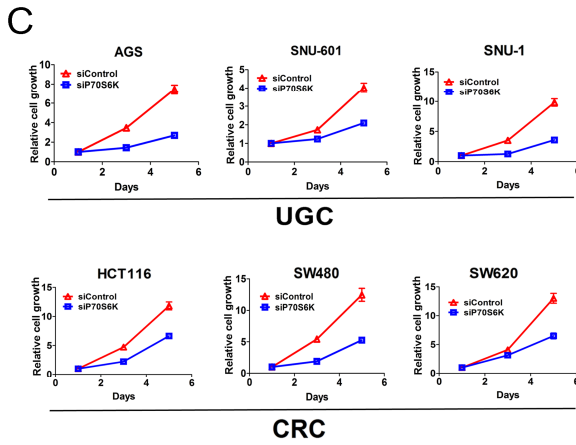

Supplementary Figure S4



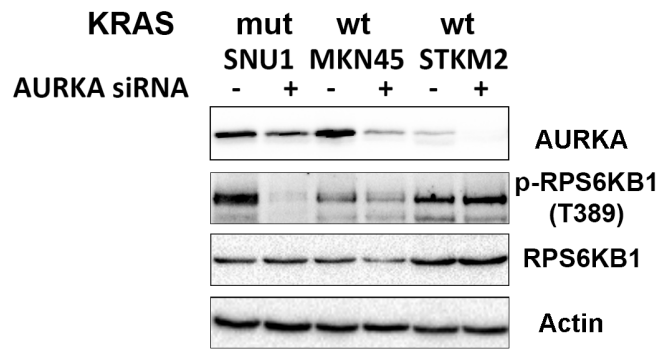

Supplementary Figure S5
